# Supplementary material
Source: PubMed Central journal article supplement (PMC2581992)
Supplement: blood-2008-06-165027_3.pdf [file blood-2008-06-165027_3.pdf]

| <b>Gene</b>   | <b>Forward Primer</b>     | <b>Reverse Primer</b>        | <b>Taqman Probe</b>           |
|---------------|---------------------------|------------------------------|-------------------------------|
| <i>MSH6</i>   | CCAGGTGCTTAAAGGTATGACTTCA | AGTCTGATTCCATTGGGTTGACACCAGG | GAGAGGGCCAATTCACCTTTTCTC      |
| <i>PAX5</i>   | GCTCCTTCGGATCTACCAGAAA    | CCAAAGAAACCGGACATTTTATTATG   | CCTTGGCATTGTTGGGAGAAGAGTGGG   |
| <i>CDKN2A</i> | GCATCCCAGGCATCTTTT        | GGCGCCCTTTGGTTATCG           | CACCTGGTGCGGAGTGAGCCAG        |
| <i>IKZF1</i>  | TGGCCAGTGAGCCCTTCA        | GGCCTGACATAGCCCCAGAT         | TGCAACAAAGATTTTTCTAGAGCCCCTGC |
| <i>EBF1</i>   | CTGTGTCCCACCTCTGACTTCA    | GTGGAAGGAAGCCACGACAT         | CATGTCTGACCCTGACCACAACCTGC    |
